# Supplementary figures and images for: Contribution of organic carotenoid and carbonaceous biomass of Tagetes erecta flowers for enhanced solar hydrogen generation
Source: Royal Society of Chemistry journal article supplement (doi:10.1039/d4ya00390j), 2025-01-01

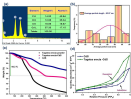

Supplement: d4ya00390j3.pdf [file d4ya00390j3.pdf]

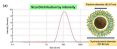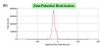

Supplement: d4ya00390j4.pdf [file d4ya00390j4.pdf]

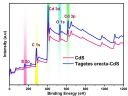

Supplement: d4ya00390j5.pdf [file d4ya00390j5.pdf]

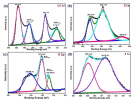

Supplement: d4ya00390j6.pdf [file d4ya00390j6.pdf]

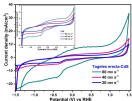

Supplement: d4ya00390j7.pdf [file d4ya00390j7.pdf]

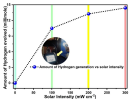

Supplement: d4ya00390j8.pdf [file d4ya00390j8.pdf]

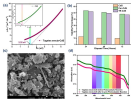

Supplement: d4ya00390j9.pdf [file d4ya00390j9.pdf]
